# Supplementary material
Source: MDPI journal article supplement (https://www.mdpi.com/2073-4441/12/11/3043)
Supplement: s1 [file s1]

Supplementary Figures and Tables

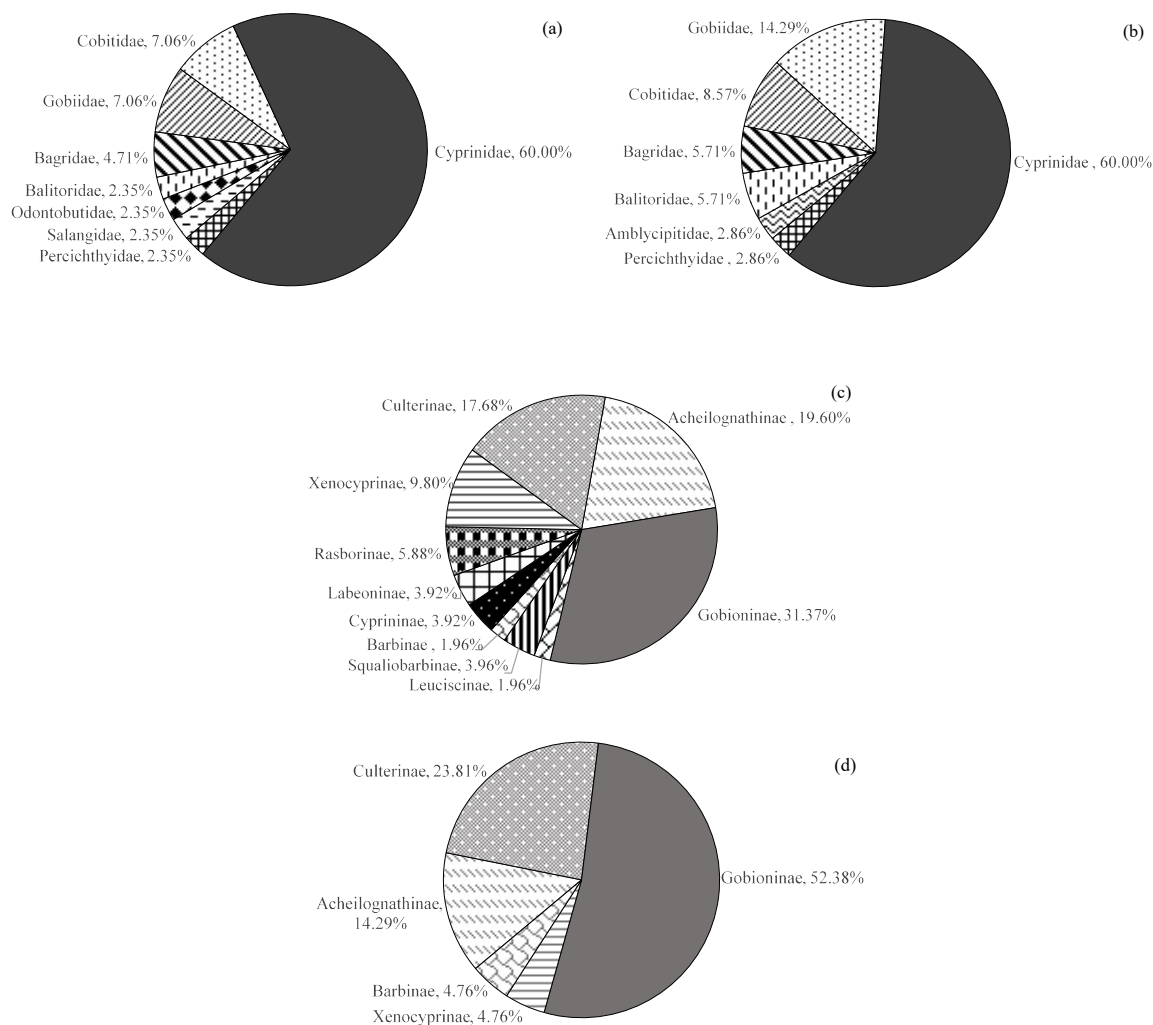

**Figure S1.** Fish species composition in the East Tiaoxi River. (a) percentage of species number of the most species-rich families to the total species; (b) percentage of endemic species number of the most endemic species-rich families; (c) percentage of species number of each sub-family to the total of Cyprinidae; (d) percentage of endemic species number of each sub-family to the total of Cyprinidae.

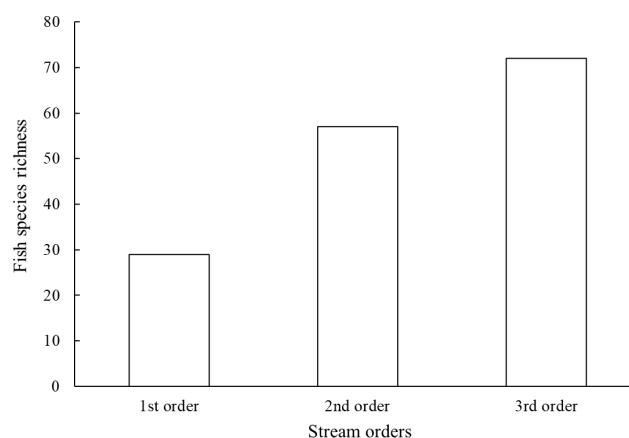

**Figure S2.** Fish species richness in each stream order of the East Tiaoxi River.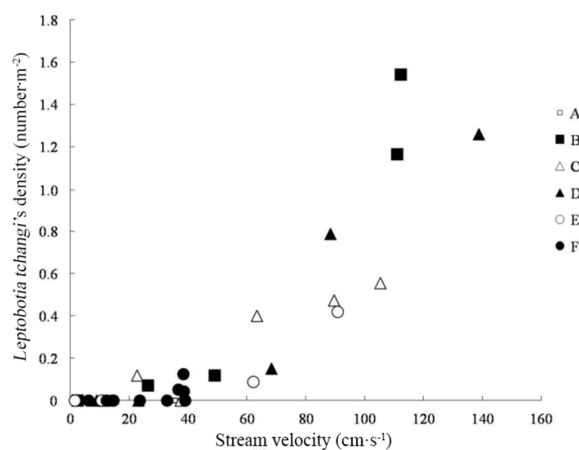**Figure S3.** The relation between *Leptobotia tchangii*'s density and stream velocity at different sampling sites.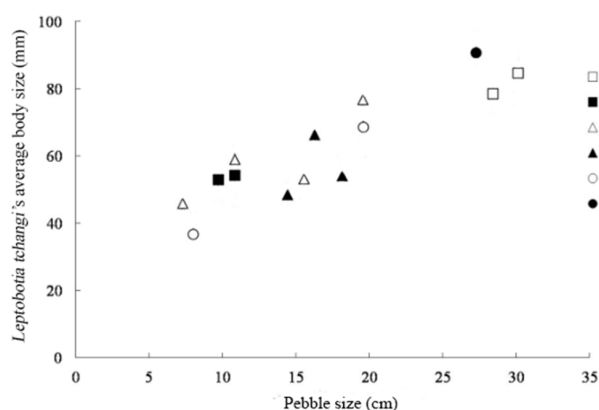**Figure S4.** The relation between *Leptobotia tchangii*'s body size and pebble size at different sampling sites.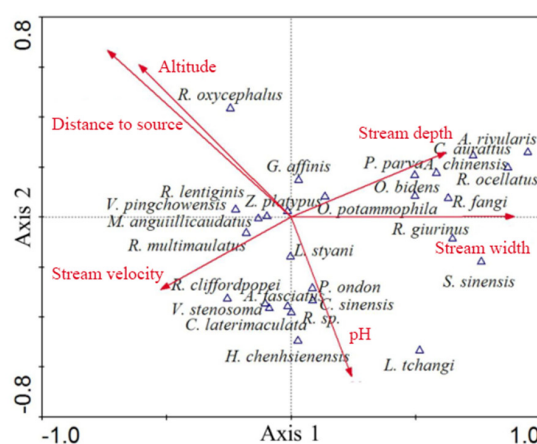**Figure S5.** Canonical Correspondence Analysis (CCA) of environmental factors and fish assemblage. The length of an environmental vector reflects correlation strength, and the direction shows its relationship with the fish species.

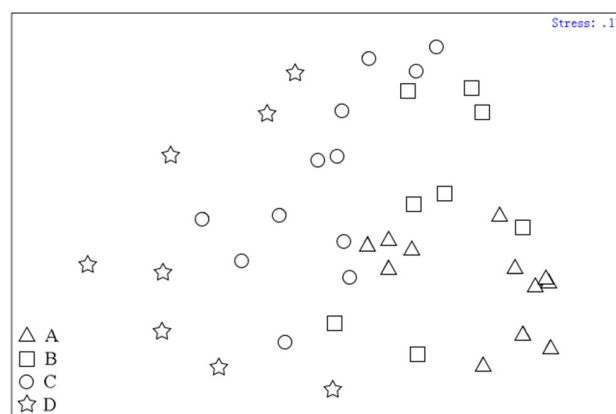

**Figure S6.** Impacts of anthropogenic activities to non-parametric multidimensional scaling (NMDS) ordination of fish assemblages. A: residential area; B: residential area & revetment; C: residential area, revetment & farmland; D: residential area, revetment, farmland & factory.

**Table S1.** The list of fish species and their distribution in the East Tiaoxi River.

| Scientific name                                | Distribution |     |     |      |      |
|------------------------------------------------|--------------|-----|-----|------|------|
|                                                | NTR          | MTR | STR | METR | LETR |
| Clupeiformes                                   |              |     |     |      |      |
| Engraulidae                                    |              |     |     |      |      |
| <i>Coilia nasus</i>                            |              |     |     |      | +    |
| Cypriniformes                                  |              |     |     |      |      |
| Balitoridae                                    |              |     |     |      |      |
| <i>Vanmanenia pingchowensis</i> <sup>a</sup>   | +            | +   | +   |      |      |
| <i>Vanmanenia stenosoma</i> <sup>a</sup>       | +            | +   | +   |      |      |
| Cobitidae                                      |              |     |     |      |      |
| <i>Cobitis dolichorhynchus</i> <sup>a</sup>    | +            | +   | +   |      |      |
| <i>Cobitis sinensis</i>                        | +            | +   | +   | +    |      |
| <i>Leptobotia tchangii</i> <sup>a,b</sup>      | +            | +   | +   |      |      |
| <i>Misgurnus anguillicaudatus</i>              | +            |     | +   | +    |      |
| <i>Nivwaella laterimaculata</i> <sup>a,b</sup> | +            | +   | +   |      |      |
| <i>Paramisgurnus dabryanus</i>                 |              |     |     |      | +    |
| Cyprinidae                                     |              |     |     |      |      |
| <i>Abbottina rivularis</i>                     | +            | +   | +   | +    |      |

| Scientific name                               | Distribution |     |     |      |      |
|-----------------------------------------------|--------------|-----|-----|------|------|
|                                               | NTR          | MTR | STR | METR | LETR |
| <i>Acheilognathus barbatulus</i>              | +            |     |     |      |      |
| <i>Acheilognathus chankaensis</i>             |              |     |     | +    |      |
| <i>Acheilognathus gracilis</i> <sup>a,b</sup> | +            | +   |     | +    |      |
| <i>Acheilognathus imberbis</i> <sup>a</sup>   | +            | +   |     | +    |      |
| <i>Acheilognathus macropterus</i>             | +            | +   |     | +    | +    |
| <i>Acheilognathus tonkinensis</i>             | +            | +   |     | +    | +    |
| <i>Acrossocheilus fasciatus</i> <sup>a</sup>  | +            | +   | +   |      |      |
| <i>Aphyocypris chinensis</i>                  | +            |     |     |      |      |
| <i>Carassius auratus</i>                      | +            | +   | +   | +    | +    |
| <i>Chanodichthys dabryi</i>                   | +            | +   |     | +    | +    |
| <i>Chanodichthys erythropterus</i>            |              |     |     | +    | +    |
| <i>Chanodichthys mongolicus</i>               |              | +   |     |      |      |
| <i>Ctenopharyngodon idellus</i>               |              |     |     | +    |      |
| <i>Cirrhinus cirrhosus</i>                    |              |     |     |      | +    |
| <i>Cirrhinus molitorella</i>                  |              |     |     | +    |      |
| <i>Culter alburnus</i>                        |              |     |     |      | +    |
| <i>Cyprinus carpio</i> Linnaeus               |              | +   |     | +    | +    |
| <i>Gnathopogon imberbis</i> <sup>a</sup>      |              | +   |     |      |      |
| <i>Hemibarbus maculatus</i>                   |              |     |     |      | +    |
| <i>Hemiculter lucidus</i>                     |              |     |     | +    | +    |
| <i>Hemiculter leucisculus</i>                 | +            | +   |     | +    | +    |
| <i>Hemiculterella wui</i> <sup>a</sup>        |              | +   |     |      |      |
| <i>Huigobio chenhshienensis</i> <sup>a</sup>  | +            | +   | +   |      |      |
| <i>Hypophthalmichthys molitrix</i>            |              |     |     | +    |      |
| <i>Hypophthalmichthys nobilis</i>             |              |     |     | +    |      |

| Scientific name                                    | Distribution |     |     |      |      |
|----------------------------------------------------|--------------|-----|-----|------|------|
|                                                    | NTR          | MTR | STR | METR | LETR |
| <i>Megalobrama amblycephala</i> <sup>a,b</sup>     |              |     |     |      | +    |
| <i>Microphysogobio fukiensis</i> <sup>a</sup>      | +            | +   |     | +    |      |
| <i>Microphysogobio kiatingensis</i> <sup>a</sup>   |              | +   | +   |      |      |
| <i>Mylopharyngodon piceus</i>                      |              |     |     | +    |      |
| <i>Opsariichthys bidens</i>                        | +            | +   | +   | +    |      |
| <i>Paracanthobrama guichenoti</i> <sup>a</sup>     |              |     |     |      | +    |
| <i>Pseudobrama simoni</i> <sup>a</sup>             |              | +   |     | +    | +    |
| <i>Pseudorasbora parva</i>                         | +            | +   | +   | +    | +    |
| <i>Rhodeus fangi</i> <sup>a</sup>                  | +            | +   | +   | +    |      |
| <i>Rhodeus ocellatus</i>                           | +            | +   | +   | +    |      |
| <i>Rhodeus sinensis</i> <sup>a</sup>               | +            | +   | +   | +    | +    |
| <i>Rhynchocypris oxycephalus</i>                   | +            | +   | +   |      |      |
| <i>Sarcocheilichthys kiangsiensis</i> <sup>a</sup> | +            | +   |     | +    |      |
| <i>Sarcocheilichthys nigripinnis</i> <sup>a</sup>  | +            | +   |     | +    |      |
| <i>Sarcocheilichthys parvus</i> <sup>a</sup>       | +            | +   |     |      |      |
| <i>Sarcocheilichthys sinensis</i>                  |              | +   |     | +    |      |
| <i>Saurogobio dabryi</i> Bleeker                   |              |     |     | +    |      |
| <i>Saurogobio gymnocheilus</i>                     |              |     |     | +    |      |
| <i>Sinibrama wui</i> <sup>a</sup>                  |              |     |     | +    |      |
| <i>Squalidus argentatus</i> <sup>a</sup>           | +            | +   | +   | +    |      |
| <i>Squalidus wolterstorffi</i> <sup>a</sup>        | +            | +   |     |      |      |
| <i>Tanakia himantegus</i> <sup>a</sup>             | +            | +   |     | +    |      |
| <i>Xenocypris argentea</i>                         |              |     |     | +    | +    |
| <i>Xenocypris microlepis</i>                       |              | +   |     | +    | +    |
| <i>Zacco platypus</i>                              | +            | +   | +   |      |      |

| Scientific name                            | Distribution |     |     |      |      |
|--------------------------------------------|--------------|-----|-----|------|------|
|                                            | NTR          | MTR | STR | METR | LETR |
| Siluriformes                               |              |     |     |      |      |
| Amblycipitidae                             |              |     |     |      |      |
| <i>Liobagrus styani</i> <sup>a,b</sup>     | +            | +   | +   |      |      |
| Bagridae                                   |              |     |     |      |      |
| <i>Pseudobagrus ondon</i> <sup>1930a</sup> | +            | +   | +   |      |      |
| <i>Pseudobagrus tenuis</i> <sup>a</sup>    | +            |     |     |      | +    |
| <i>Tachysurus fulvidraco</i>               |              | +   |     | +    | +    |
| <i>Tachysurus nitidus</i>                  |              |     |     | +    |      |
| Siluridae                                  |              |     |     |      |      |
| <i>Silurus asotus</i>                      |              |     | +   | +    |      |
| Salmoniformes                              |              |     |     |      |      |
| Salangidae                                 |              |     |     |      |      |
| <i>Neosalanx tangkahkeii</i>               |              |     |     |      | +    |
| <i>Protosalanx chinensis</i>               |              |     |     |      | +    |
| Beloniformes                               |              |     |     |      |      |
| Hemiramphidae                              |              |     |     |      |      |
| <i>Hyporhamphus intermedius</i>            |              |     |     |      | +    |
| Cyprinodontiformes                         |              |     |     |      |      |
| Adrianichthyidae                           |              |     |     |      |      |
| <i>Oryzias sinensis</i>                    | +            | +   | +   |      |      |
| Poeciliidae                                |              |     |     |      |      |
| <i>Gambusia affinis</i>                    | +            | +   | +   | +    |      |
| Synbranchiformes                           |              |     |     |      |      |
| Mastacembelidae                            |              |     |     |      |      |
| <i>Sinobdella sinensis</i> <sup>a</sup>    | +            | +   | +   | +    |      |

| Scientific name                                  | Distribution |     |     |      |      |
|--------------------------------------------------|--------------|-----|-----|------|------|
|                                                  | NTR          | MTR | STR | METR | LETR |
| Synbranchidae                                    |              |     |     |      |      |
| <i>Monopterus albus</i>                          | +            |     | +   |      | +    |
| Perciformes                                      |              |     |     |      |      |
| Channidae                                        |              |     |     |      |      |
| <i>Channa argus</i>                              | +            |     |     |      | +    |
| Gobiidae                                         |              |     |     |      |      |
| <i>Rhinogobius guirinus</i>                      | +            | +   | +   | +    | +    |
| <i>Rhinogobius cliffordpopei</i> <sup>a</sup>    | +            | +   | +   |      |      |
| <i>Rhinogobius lentiginis</i> <sup>a,b</sup>     | +            | +   | +   |      |      |
| <i>Rhinogobius multimaculatus</i> <sup>a,b</sup> | +            | +   |     |      |      |
| <i>Rhinogobius sp1</i> <sup>a,b</sup>            | +            | +   | +   |      |      |
| <i>Rhinogobius sp2</i> <sup>a,b</sup>            | +            |     | +   |      |      |
| Odontobutidae                                    |              |     |     |      |      |
| <i>Micropercops cinctus</i>                      | +            |     |     | +    |      |
| <i>Odontobutis potamophila</i>                   | +            | +   | +   | +    |      |
| Osphronemidae                                    |              |     |     |      |      |
| <i>Macropodus ocellatus</i>                      |              |     |     | +    | +    |
| Percichthyidae                                   |              |     |     |      |      |
| <i>Siniperca chuatsi</i> <sup>a</sup>            | +            |     |     | +    |      |

NTR North Tiaoxi River, MTR Middle Tiaoxi River, STR South Tiaoxi River, METR Middle reach of East Tiaoxi River, LETR Lower reach of East Tiaoxi River

<sup>a</sup> Species endemic to China.

<sup>b</sup> Species endemic to the Yangtze River Basin.

**Table S2.** Criteria for river health assessment based on ecological integrity of fish in the East Tiaoxi River.

|               | Healthy | Fair     | Poor    | Very poor | Null |
|---------------|---------|----------|---------|-----------|------|
| Upper reaches | > 46    | > 31- 46 | > 15-31 | ≤ 15      | 0    |
| Middle and    | > 36    | > 24- 36 | > 12-24 | ≤ 12      | 0    |

**Table S3.** River health condition based on Fish Integrated Biotic Index.

| Monitoring | Index | Health    | Monitoring site | Index | Health    |
|------------|-------|-----------|-----------------|-------|-----------|
| site       | value | condition |                 | value | condition |
| S1         | 29    | Fair      | S11             | 32    | Fair      |
| S2         | 28    | Fair      | S12             | 36    | Fair      |
| S3         | 28    | Fair      | S28             | 32    | Fair      |
| S4         | 21    | Poor      | S29             | 30    | Fair      |
| S5         | 26    | Fair      | S34             | 40    | Healthy   |
| S6         | -     | Null      | S35             | 40    | Healthy   |
| S7         | 29    | Fair      | S36             | 34    | Fair      |
| S8         | 27    | Fair      |                 |       |           |
| S16        | 43    | Fair      | S41             | 31    | Poor      |
| S17        | 40    | Fair      | S42             | 28    | Poor      |
| S20        | 35    | Fair      | S43             | 39    | Fair      |
| S21        | 43    | Fair      | S44             | 35    | Fair      |
| S22        | 34    | Fair      | S45             | 39    | Fair      |
| S23        | 26    | Poor      | S46             | 28    | Poor      |
| S24        | 33    | Fair      | S47             | 33    | Fair      |
| S25        | 30    | Poor      | S48             | 31    | Poor      |
| S26        | 23    | Poor      | S49             | -     | Null      |
| S27        | 22    | Poor      | S50             | 16    | Poor      |
| S30        | 33    | Fair      | S51             | 22    | Poor      |
| S31        | 25    | Poor      | S52             | 24    | Poor      |
| S37        | 19    | Poor      | S53             | 28    | Poor      |
| S39        | 28    | Poor      | S54             | 19    | Poor      |
| S40        | 24    | Poor      | S55             | 23    | Poor      |



**Table S4.** Matrix of Spearman  $r_s$  correlation coefficients of environmental variables.

|             | S       | N     | $H'$    | Altitude | Width  | Dis.   | Velocity | Depth | pH     | Temperature | DO    | EC     | Turbidity | TP    | TN   | TOC   | Chla |
|-------------|---------|-------|---------|----------|--------|--------|----------|-------|--------|-------------|-------|--------|-----------|-------|------|-------|------|
| S           | 1.00    |       |         |          |        |        |          |       |        |             |       |        |           |       |      |       |      |
| N           | 0.18    | 1.00  |         |          |        |        |          |       |        |             |       |        |           |       |      |       |      |
| $H'$        | 0.77**  | -0.07 | 1.00    |          |        |        |          |       |        |             |       |        |           |       |      |       |      |
| Altitude    | -0.69** | 0.06  | -0.56** | 1.00     |        |        |          |       |        |             |       |        |           |       |      |       |      |
| Width       | 0.56**  | 0.10  | 0.29    | -0.77**  | 1.00   |        |          |       |        |             |       |        |           |       |      |       |      |
| Dis.        | 0.51**  | -0.09 | 0.42**  | -0.88**  | 0.78** | 1.00   |          |       |        |             |       |        |           |       |      |       |      |
| Velocity    | -0.10   | -0.23 | 0.26    | 0.22     | -0.34* | -0.16  | 1.00     |       |        |             |       |        |           |       |      |       |      |
| Depth       | 0.13    | -0.25 | 0.11    | -0.23    | 0.10   | 0.11   | -0.21    | 1.00  |        |             |       |        |           |       |      |       |      |
| pH          | 0.49**  | 0.18  | 0.41**  | -0.62**  | 0.45** | 0.47** | -0.10    | 0.02  | 1.00   |             |       |        |           |       |      |       |      |
| Temperature | 0.17    | -0.12 | 0.31    | -0.17    | 0.08   | 0.12   | 0.52**   | -0.08 | 0.28   | 1.00        |       |        |           |       |      |       |      |
| DO          | 0.19    | 0.21  | 0.01    | -0.25    | 0.28   | 0.25   | -0.41**  | -0.08 | 0.29   | -0.69**     | 1.00  |        |           |       |      |       |      |
| EC          | 0.44**  | 0.24  | 0.30    | -0.69**  | 0.52** | 0.72** | -0.22    | -0.04 | 0.61** | 0.08        | 0.28  | 1.00   |           |       |      |       |      |
| Turbidity   | 0.36*   | -0.09 | 0.56**  | -0.35*   | -0.02  | 0.29   | 0.24     | 0.21  | 0.29   | 0.23        | -0.08 | 0.39*  | 1.00      |       |      |       |      |
| TP          | 0.35*   | 0.10  | 0.29    | -0.23    | 0.13   | 0.13   | 0.15     | 0.23  | 0.04   | 0.18        | -0.08 | -0.11  | 0.10      | 1.00  |      |       |      |
| TN          | -0.03   | 0.05  | -0.25   | 0.08     | -0.08  | -0.10  | -0.46**  | 0.04  | -0.05  | -0.31*      | 0.10  | 0.07   | -0.28     | -0.27 | 1.00 |       |      |
| TOC         | 0.22    | -0.08 | 0.29    | -0.25    | 0.10   | 0.12   | -0.21    | 0.18  | 0.00   | -0.15       | 0.10  | 0.03   | 0.18      | 0.09  | 0.01 | 1.00  |      |
| Chla        | 0.28    | 0.14  | 0.20    | -0.40*   | 0.11   | 0.36*  | -0.09    | 0.03  | 0.48** | -0.08       | 0.37* | 0.51** | 0.46**    | -0.07 | 0.20 | -0.01 | 1.00 |

Abbreviations: S total number of fish species, N total number of caught,  $H'$  Shannon-Weaver index, Dis. Distance to source, DO dissolved oxygen, EC electrical conductivity, TP total phosphorus, TN total nitrogen, TOC total organic carbon, Chla Chlorophyll-a

\*\* Correlation is significant at the 0.01 level.

\* Correlation is significant at the 0.05 level.

**Table S5.** One-way ANOSIM for analysing the impacts of human activities on fish communities.

|   | A      | B     | C      | D |
|---|--------|-------|--------|---|
| A |        |       |        |   |
| B | 0.338* |       |        |   |
| C | 0.571* | 0.16  |        |   |
| D | 0.855* | 0.65* | 0.331* |   |

A: residential area; B: residential area & revetment; C: residential area, revetment & farmland; D: residential area, revetment, farmland & factory.

\* Correlation is significant at the 0.05 level.
